# Supplementary material
Source: PubMed Central journal article supplement (PMC5240655)
Supplement: NIHMS831779-supplement-S.pdf [file NIHMS831779-supplement-S.pdf]

# Supplementary Figure S1 Sanger Sequencing results of NKX2-1 intragenic mutations No. 11-27.

Reference sequence Isoform 2 REFSEQ NM\_003317.3

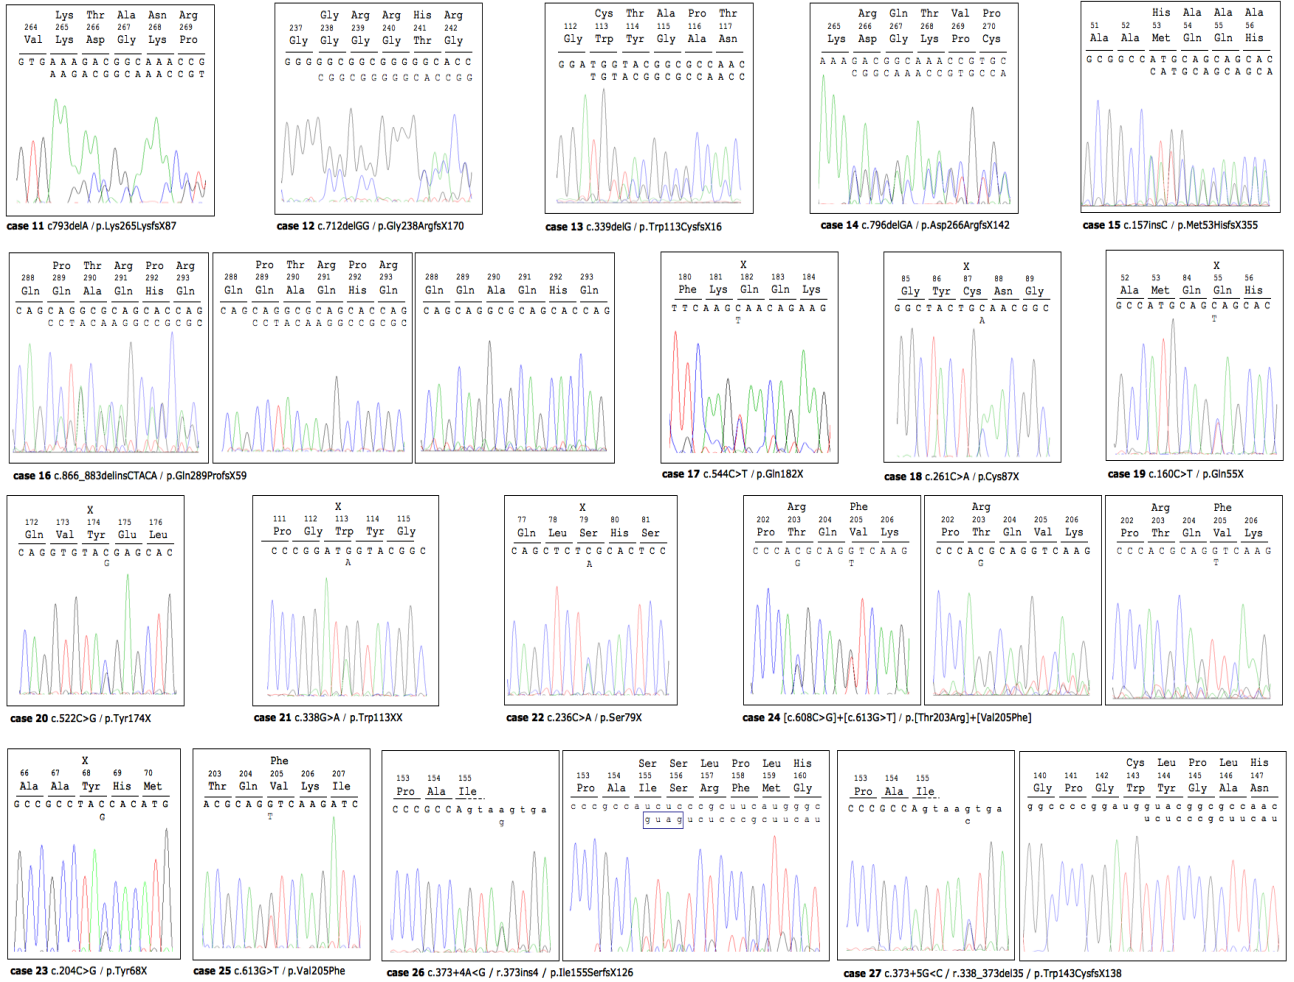

## Supplementary Figure S2: CNVs detected by high resolution Array-CGH.

Array CGH results are given as log<sub>2</sub> ratio profiles for deletions No. 1-8 for the whole genomic interval covered by our custom oligonucleotide array (left) and as a close-up with focus on *NKX2-1* (right). The blue line, horizontal in the overview and vertical in the zoom-in, pinpoints the position of *NKX2-1*. Size and coordinates of CNVs are given to the left (Hg18).

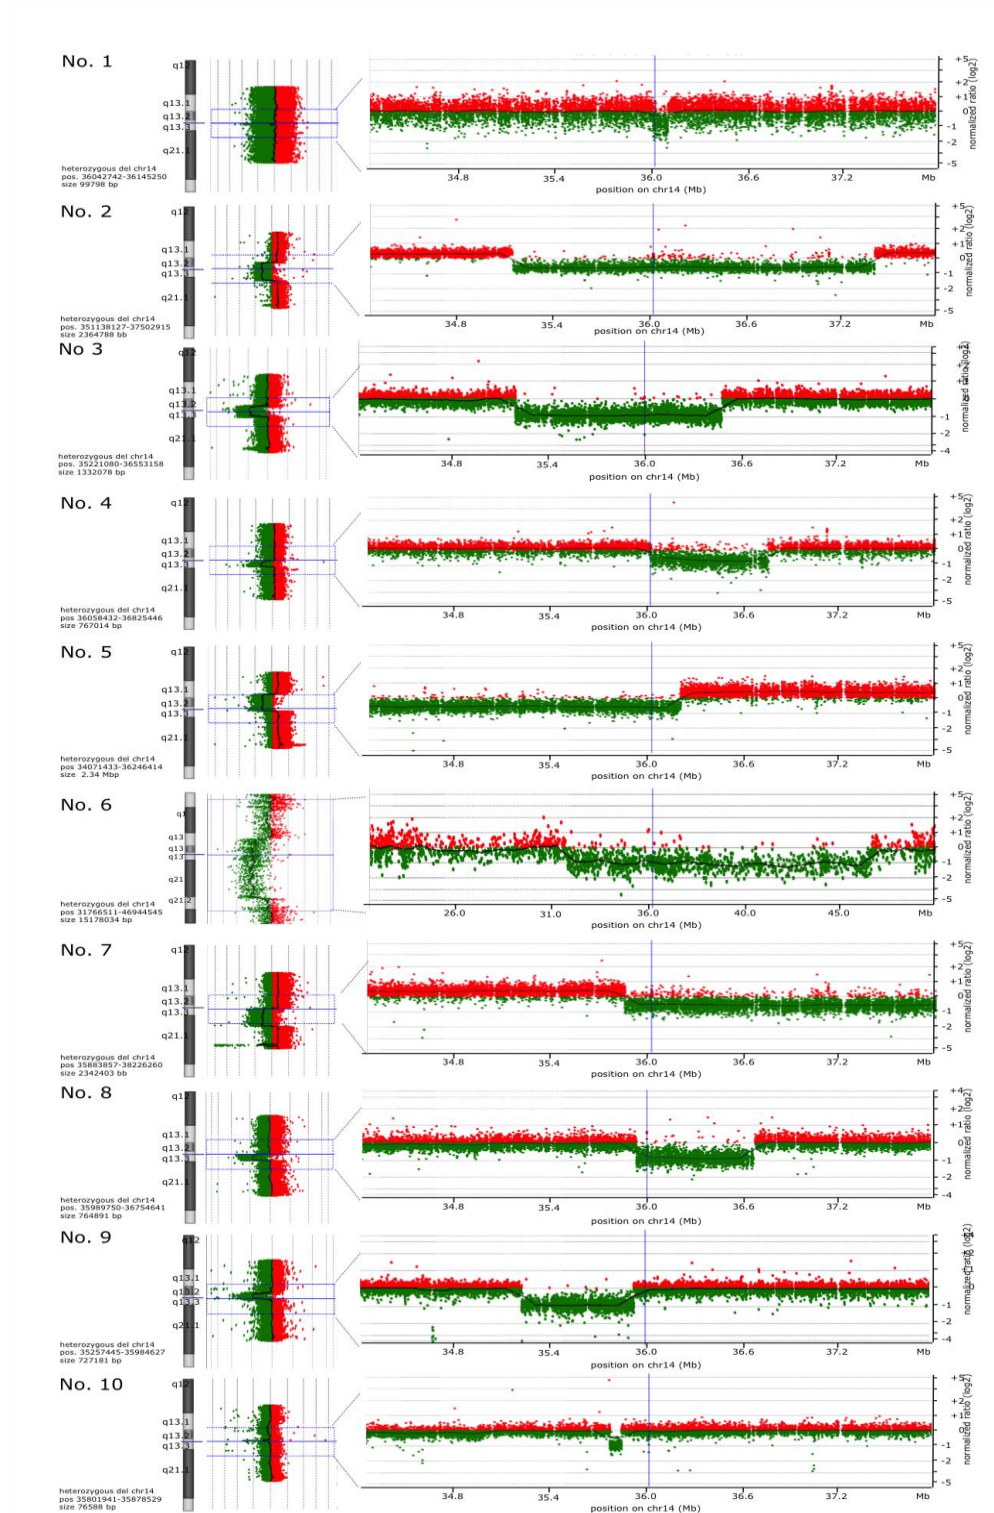

**Supplementary Figure S3: Brain, thyroid and lung involvement in index patients and family members** Venn diagrams demonstrating that symptom involvement is identical in A index cases (n=32), including also the 5 index patients of our previous study [8] to that of B family members (n=18), except 3 patients with isolated asthma phenotype.

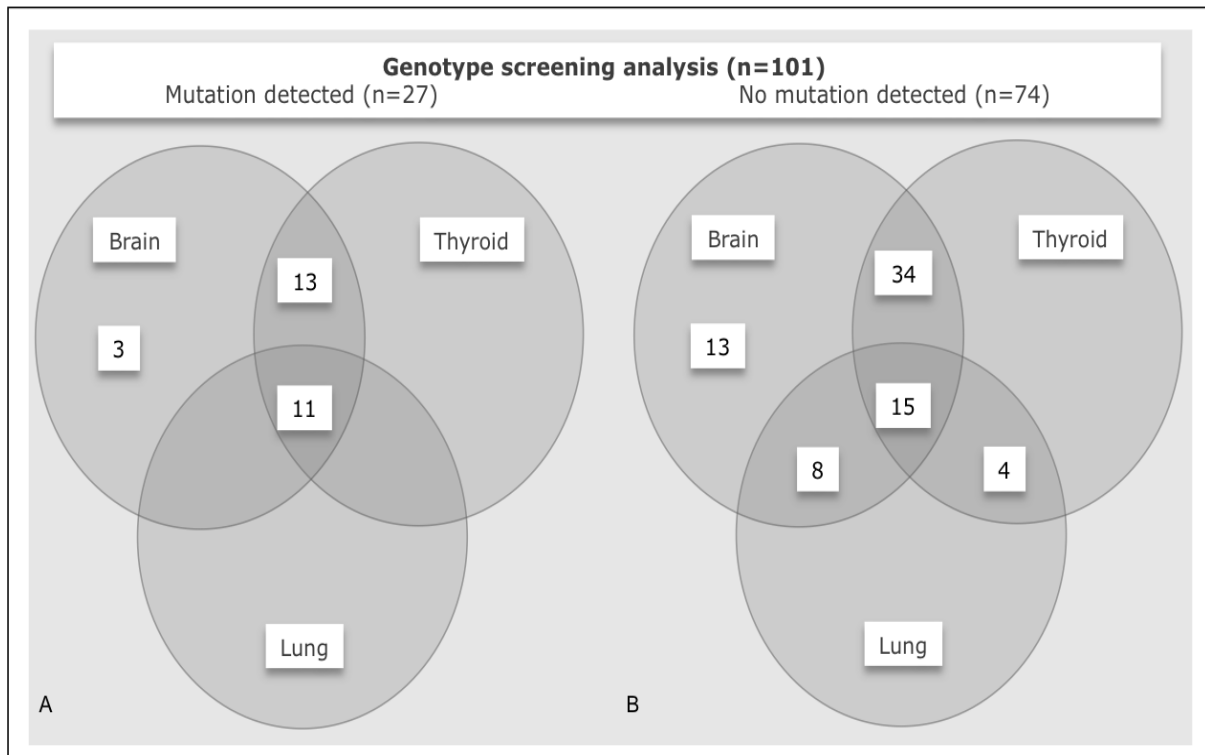

**Supplementary Figure S4: Pedigrees demonstrating autosomal dominant mode of inheritance**

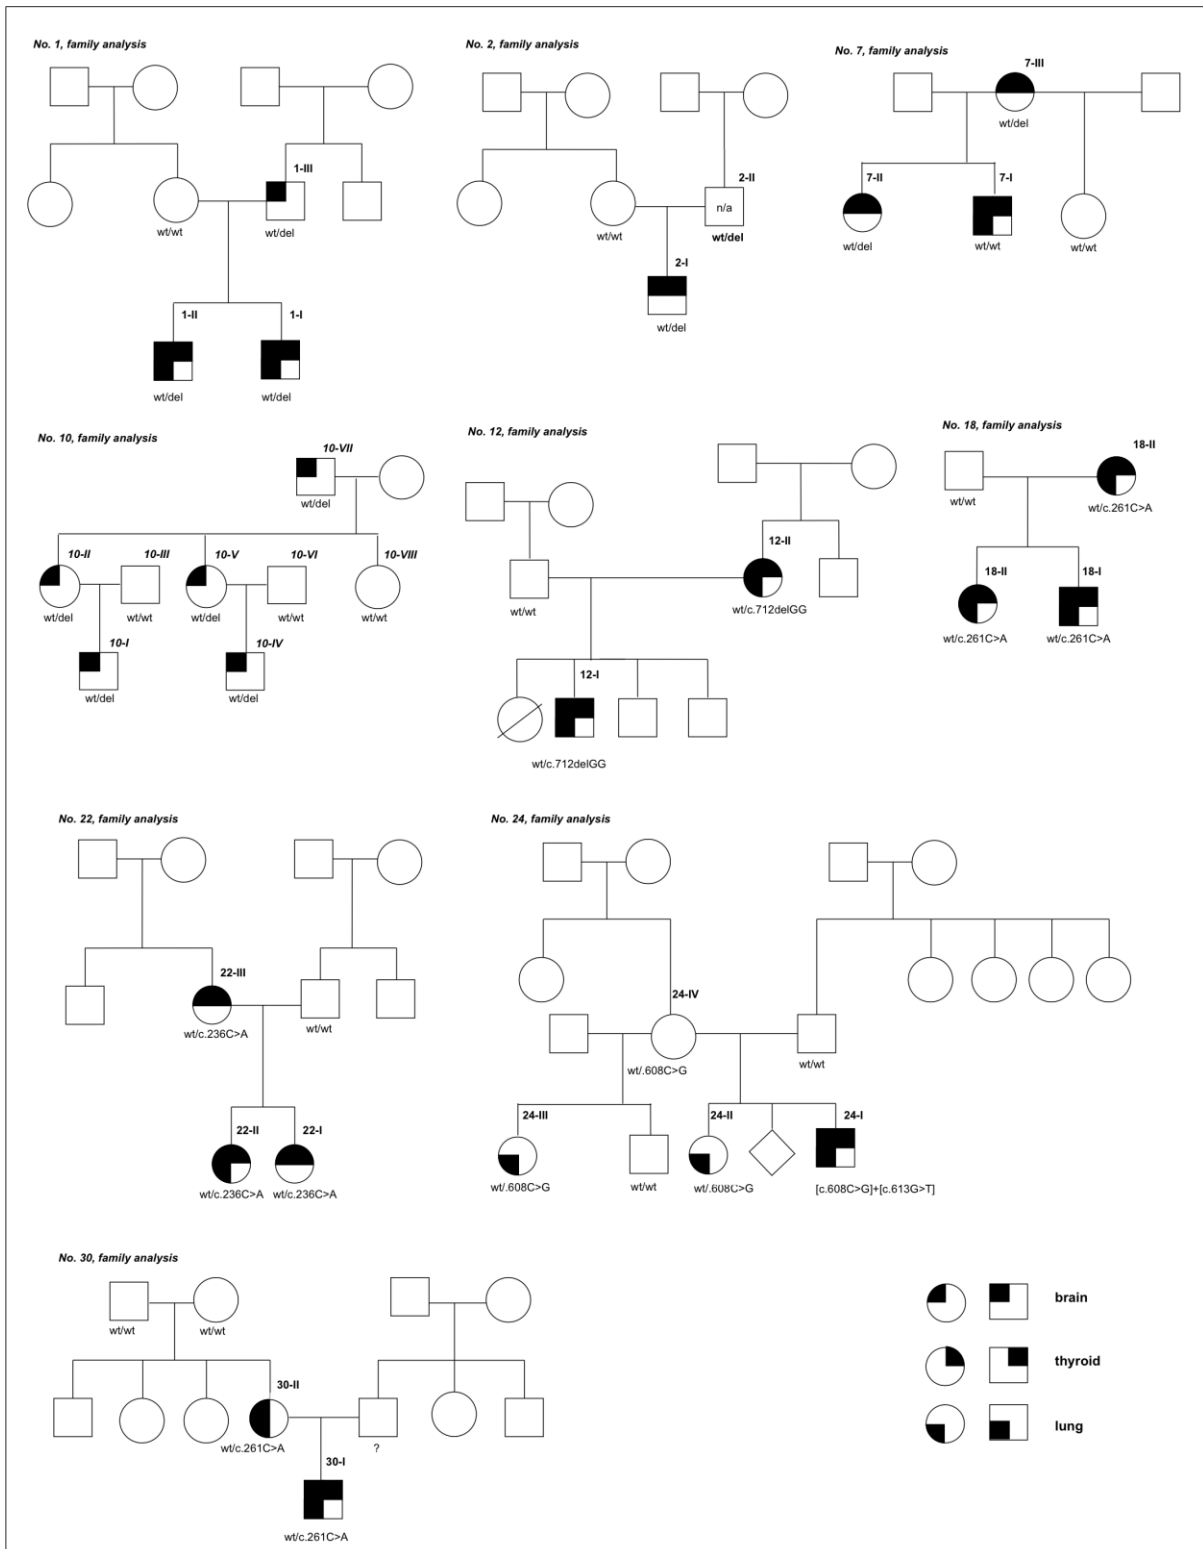

**Supplementary Figure S5: Enhancers and CTCF binding sites near NKX2-1**

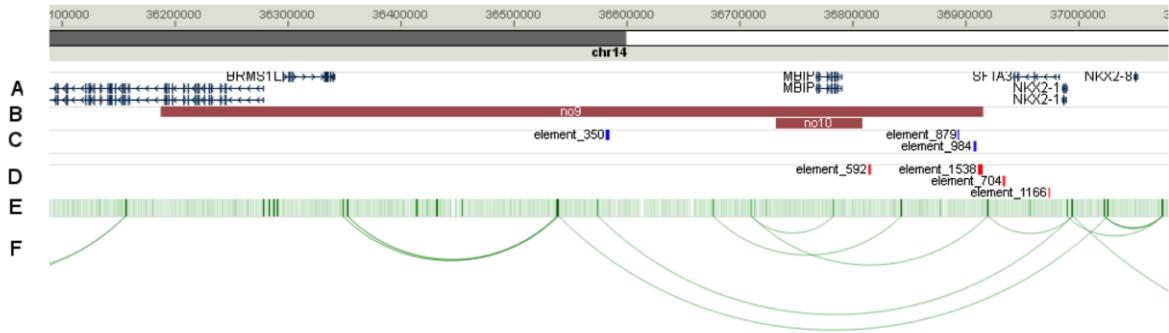

**Supplementary Table 1 Overview of reported *NKX2-1* mutations**

| DNA sequence                             |                                          | Protein localisation | Protein level          |                   | Inheritance    |                          | Phenotype of index patient |                                         |                       | Reference |
|------------------------------------------|------------------------------------------|----------------------|------------------------|-------------------|----------------|--------------------------|----------------------------|-----------------------------------------|-----------------------|-----------|
| as quoted in reference                   | according to HGNC                        |                      | as quoted in reference | according to HGNC |                | Affected family members* | Thyroid dysfunction        | Choreo-athetosis/<br>Muscular hypotonia | Pulmonary malfunction |           |
| del 14q13-21                             | del 14q13-21                             | entire protein       |                        | p.0               | AD             | F 1                      | yes                        | yes                                     | yes                   | [6]       |
| del 14q12-13.3                           | del 14q12-13.3                           | entire protein       |                        | p.0               | <i>de novo</i> | F 1                      | yes                        | yes                                     | yes                   | [7]       |
| del 14q13.1(1.2 Mb)                      | del 14q13.1(1.2 Mb)                      | entire protein       |                        | p.0               | <i>de novo</i> | F 1                      | n/a                        | yes                                     | n/a                   | [10]      |
| del 14q11.2-13.3                         | del 14q11.2-13.3                         | entire protein       |                        | p.0               | <i>de novo</i> | M 1                      | yes                        | yes                                     | yes                   | [8]       |
| del 14q12-13.3(3.5 Mb)                   | del 14q12-13.3(3.5 Mb)                   | entire protein       |                        | p.0               | n/a            | M 1                      | n/a                        | yes                                     | yes                   | [11]      |
| del 14q13.(0.9 Mb)                       | del 14q13.(0.9 Mb)                       | entire protein       |                        | p.0               | AD             | M 3                      | yes                        | yes                                     | no                    | [12]      |
| del 14q13                                | del 14q13                                | entire protein       |                        | p.0               | <i>de novo</i> | F 1                      | yes                        | yes                                     | yes                   | [13]      |
| del NKX2.1                               | del NKX2.1                               | entire protein       |                        | p.0               | AD             | M 2                      | yes                        | yes                                     | yes                   | [14]      |
| del NKX2.1                               | del NKX2.1                               | entire protein       |                        | p.0               | <i>de novo</i> | F 1                      | yes                        | yes                                     | no                    | [14]      |
| 14q13.2q22.1 deletion (13.8 Mb)          | del 14q13.2-q22.1 (13.8 Mb)              | entire protein       |                        | p.0               | <i>de novo</i> | F 1                      | no                         | yes                                     | no                    | [15]      |
| 14q13.2q21.2 deletion (6.2 Mb)           | del 14q13.2-q21.2 (6.2 Mb)               | entire protein       |                        | p.0               | <i>de novo</i> | F 1                      | yes                        | yes                                     | no                    | [15]      |
| 14q13.3 deletion (0.3 Mb)                | del 14q13.3 (0.3 Mb)                     | entire protein       |                        | p.0               | <i>de novo</i> | F 1                      | yes                        | yes                                     | no                    | [15]      |
| chr14:g(355199722_3886152)del (3.69 Mb)  | chr14:g(355199722_38886152)del (3.69 Mb) | entire protein       |                        | p.0               | <i>de novo</i> | F 1                      | yes                        | yes                                     | no                    | [16]      |
| chr14:g(36010235_36727597)del (717 kb)   | chr14:g(36010235_36727597)del (717 kb)   | entire protein       |                        | p.0               | <i>de novo</i> | M 1                      | yes                        | yes                                     | yes                   | [16]      |
| chr14:g(36114849_36219911)del (105 kb)   | chr14:g(36114849_36219911)del (105 kb)   | entire protein       |                        | p.0               | <i>de novo</i> | M 1                      | no                         | n/a                                     | n/a                   | [16]      |
| chr14:g(34077461_43971142)del (9.89 Mb)  | chr14:g(34077461_43971142)del (9.89 Mb)  | entire protein       |                        | p.0               | <i>de novo</i> | F 1                      | yes                        | yes                                     | yes                   | [16]      |
| chr14:g(33670261_40648438)del (6.98 Mb)  | chr14:g(33670261_40648438)del (6.98 Mb)  | entire protein       |                        | p.0               | n/a            | F 1                      | yes                        | yes                                     | yes                   | [16]      |
| chr14:g(24383933_41340975)del (16.96 Mb) | chr14:g(24383933_41340975)del (16.96 Mb) | entire protein       |                        | p.0               | <i>de novo</i> | F 1                      | yes                        | n/a                                     | yes                   | [16]      |
| chr14:g(29701682_45144380)del (15.44 Mb) | chr14:g(29701682_45144380)del (15.44 Mb) | entire protein       |                        | p.0               | n/a            | F 1                      | yes                        | yes                                     | yes                   | [16]      |
| del 14q13.1-q21.1                        | del 14q13.1-q21.1                        | entire protein       |                        | p.0               | n/a            | F 1                      | yes                        | yes                                     | yes                   | [32]      |
| del 14q13.3                              | del 14q13.3                              | entire protein       |                        | p.0               | n/a            | F 1                      | yes                        | yes                                     | yes                   | [32]      |
| del 14q13.-q21.1                         | del 14q13.-q21.1                         | entire protein       |                        | p.0               | n/a            | F 1                      | yes                        | yes                                     | yes                   | [32]      |
| del 14q13.-q21.1                         | del 14q13.-q21.1                         | entire protein       |                        | p.0               | n/a            | M 1                      | yes                        | yes                                     | yes                   | [32]      |
| del 14q13.3.                             | del 14q13.3                              | entire protein       |                        | p.0               | n/a            | M 1                      | yes                        | yes                                     | yes                   | [32]      |
| 2595insGG                                | c.585nsGG                                | HD                   | fs>truncated protein   | p.Leu195GlyfsX3   | <i>de novo</i> | M 1                      | yes                        | yes                                     | yes                   | [8]       |
| 825delC                                  | c.825delC                                | NK2-STOPP/ C-Term    | missense protein       | p.Pro275ProfsX76  | AD             | F 2                      | yes                        | yes                                     | no                    | [18]      |
| c.470_479delinsGCG                       | c.470_479delinsGCG                       | TN-HD                | p.157fsX196            | p.Pro157fsX196    | <i>de novo</i> | M 1                      | yes                        | yes                                     | yes                   | [19]      |

|                                        |                                     |                   |                                       |                                       |                |                    |     |     |     |      |
|----------------------------------------|-------------------------------------|-------------------|---------------------------------------|---------------------------------------|----------------|--------------------|-----|-----|-----|------|
| c.278_306del29                         | c.188_216del29                      | TN-HD             | p.Ala93GlyfsX54                       | p.Ala63GlyfsX54                       | <i>de novo</i> | M 1                | yes | n/a | yes | [20] |
| c.750delTCAGC<br>c.399delC             | c.750delTCAGC<br>c.399delC          | HD-NK2            | frameshift                            | p.Ala250AlafsX165                     | AD             | M 3                | yes | yes | yes | [14] |
|                                        |                                     | TN-HD             | n/a                                   | p.Ser133SerfsX3                       | <i>de novo</i> | F 1                | yes | yes | yes | [15] |
| c.786_787del                           | c.786_787del                        | NK2               | n/a                                   | p.Ala259GlyfsX149                     | <i>de novo</i> | F 1                | yes | yes | yes | [15] |
| c.493delC<br>c.384_391del              | c.493delC<br>c.294_301delGCCGTACC   | HD                | p.Arg165GlyfsX32                      | p.Arg165GlyfsX32                      | AD             | F 3/M 2            | yes | yes | yes | [21] |
|                                        |                                     | TN-HD             | p.Pro129GlyfsX307                     | p.Pro99GlyfsX307                      | n/a            | F 1                | yes | yes | yes | [32] |
| 8(GCCGTACC)                            |                                     |                   |                                       |                                       |                |                    |     |     |     |      |
| c.552_556 del (CCCGC)                  | c.562_566delCCCGC                   | TN-HD             | p.Pro185AlafsX250                     | p.Pro155AlafsX250                     | n/a            | F 1                | yes | yes | yes | [32] |
| c.804_812dupCGGCGGGG<br>G              | c.714_722dupCGGCGGGG<br>G           | HD-NK2            | p.Gly269_271dupGlyGly<br>Gly          | p.Gly239_241dupGlyGly<br>Gly          | n/a            | M 2<br>(unrelated) | no  | yes | yes | [32] |
|                                        |                                     |                   |                                       |                                       |                |                    |     |     |     |      |
| c.818_838del21 &<br>c.1034_1047del14   | c.728_748del21 &<br>c.944_957del14  | NK2-STOPP/ C-Term | p.273_279delGCPQQQQ<br>&p.His346Alafs | p.243_249delGCPQQQQ<br>&p.His316Alafs | n/a            | M 1                | yes | yes | yes | [32] |
|                                        |                                     |                   |                                       |                                       |                |                    |     |     |     |      |
| c.1044_1045insC                        | c.954_955insC                       | NK2-STOPP/ C-Term | p.His349ProfsX90                      | p.His319ProfsX90                      | n/a            | M 1                | yes | yes | yes | [32] |
| c.1092_1108del17<br>(CGCCAGCCCCGCGCGC) | c.1002_1018delCGCCAGCC<br>CCGCGGCGC | NK2-STOPP/ C-Term | p.Ser366GlyfsX67                      | p.Ser336GlyfsX67                      | n/a            | M 1                | yes | no  | yes | [32] |
|                                        |                                     |                   |                                       |                                       |                |                    |     |     |     |      |
| c.1157_63 dupACTACGG;                  | c.1067_63dupACTACGG;                | NK2-STOPP/ C-Term | p.Thr389LeufsX52                      | p.Thr359LeufsX52                      | n/a            | F 1                | yes | yes | yes | [32] |
| C2519A                                 | c.506C>A                            | HD                | SerHDpos9X                            | p.Ser169X                             | n/a            | M 1                | yes | yes | no  | [8]  |
| C1302A                                 | c.261C>A                            | TN-HD             | CysHDpos-75X                          | p.Cys87X                              | n/a            | M 1                | yes | yes | yes | [8]  |
| C609A                                  | c.434C>A                            | TN-HD             | S145X                                 | p.Ser145X                             | <i>de novo</i> | F 1/M 2            | yes | yes | yes | [26] |
|                                        |                                     |                   |                                       |                                       |                |                    |     |     |     |      |
| c.342C>G                               | c.342C>G                            | TN-HD             | p.Y114X                               | p.Tyr114X                             | n/a            | M 1                | yes | yes | no  | [14] |
| c.257dupA                              | c.257dupA                           | TN-HD             | p.Tyr86X                              | p.Tyr86X                              | AD             | F 3                | yes | yes | yes | [15] |
| c.642C>A                               | c.642C>A                            | HD                | p.Tyr214X                             | p.Tyr214X                             | AD             | M 3/F 1            | yes | yes | no  | [15] |
| c.G334>T                               | c.33aG>T                            | TN-HD             | Gly112X                               | p.Gly112X                             | AD             | M 1                | yes | yes | yes | [33] |
| c.432C>A                               | c.342C>A                            | TN-HD             | p.Tyr144X                             | p.Tyr114X                             | n/a            | F 1                | yes | yes | yes | [32] |
| C727A<br>G713T<br>G2626T               | c.637C>A                            | HD                | R243S                                 | p.Arg213Ser                           | AD             | F 11/M 2           | n/a | yes | n/a | [10] |
|                                        | c.623G>T                            | HD                | W238L                                 | p.Trp208Leu                           | AD             | F 6/M 16           | n/a | yes | n/a | [10] |
|                                        | c.613G>T                            | HD                | ValHDpos45Phe                         | p.Val205Phe                           | <i>de novo</i> | M 1                | yes | yes | yes | [8]  |
| c>g                                    | c.526C>G                            | HD                | L176V                                 | p.Leu176Val                           | <i>de novo</i> | M 1                | no  | yes | no  | [13] |
| c>t                                    | c.605C>T                            | HD                | P202L                                 | p.Pro202Leu                           | <i>de novo</i> | F 1                | yes | yes | no  | [13] |
| a>c                                    | c.629A>C                            | HD                | Q210P                                 | p.Gln210Pro                           | <i>de novo</i> | F 1                | yes | yes | no  | [13] |
| ATC_TTC                                | c.619T>A                            | HD                | I207F                                 | p.Ile207Phe                           | <i>de novo</i> | F 1                | yes | n/a | yes | [27] |
| c.638G<C                               | c.638G<C                            | HD                | p.Arg213Pro                           | p.Arg213Pro                           | AD             | M 2                | no  | yes | no  | [15] |
|                                        | c.581T>G                            | HD                | p.Leu194Arg                           | p.Leu194Arg                           | AD             | F 3/M 5            | yes | yes | yes | [15] |
| c.526C>G                               | c.526C>G                            | HD                | p.Leu176Arg                           | p.Leu176Arg                           | <i>de novo</i> | M 1                | yes | yes | yes | [15] |
| c.553T>G                               | c.553T>G                            | HD                | p.Tyr185Asp                           | p.Tyr185Asp                           | <i>de novo</i> | F 1                | yes | yes | no  | [15] |

|            |                  |                              |             |             |                |     |     |     |       |      |
|------------|------------------|------------------------------|-------------|-------------|----------------|-----|-----|-----|-------|------|
| c.629A>C   | c.629A>C         | HD                           | p.Gln210Pro | p.Gln210Pro | <i>de novo</i> | F 1 | yes | yes | no    | [15] |
| c.621C > G | c.621C > G       | HD                           | p.Ile207Met | p.Ile207Met | n/a            | F 1 | yes | n/a | yes   | [28] |
| c.583C>T   | c.493C>T         | HD                           | p.Arg195Trp | p.Arg165Trp | n/a            | M 1 | yes | yes | yes   | [32] |
| c.590T>C   | c.500T>C         | HD                           | p.Leu197Pro | p.Leu167Pro | n/a            | M 1 | no  | yes | yes   | [32] |
| c.592T>C   | c.502T>C         | HD                           | p.Phe198Leu | p.Phe168Leu | AD             | F 4 | no  | no  | yes   | [32] |
| c.592T>C   | c.502T>C         | HD                           | p.Phe198Leu | p.Phe168Leu | n/a            | F 1 | no  | no  | yes   | [32] |
| c.594C>G   | c.504C>G         | HD                           | p.Phe198Leu | p.Phe168Leu | n/a            | F 1 | no  | no  | yes   | [32] |
|            | c.373+1_373+4del | TN-HD (splice acceptor site) |             | r.spl?      | AD             | F 3 | yes | yes | (yes) | [15] |

Nomenclature for mutations according to recommendations of the Human Genome Variation Society (<http://www.hgvs.org/mutnomen/>); Reference sequence REFSEQ Isoform 2 NM\_003317.3, P entire protein HD Homeodomain NK2 NK2-specific domain AD autosomal-dominant n/a information not available TN-HD sequence between Tin- and Homeodomain; \*including index patient
